# Supplementary material
Source: Springer Nature journal article supplement (https://www.springermedizin.de/resource/supplementary/12889_2013_6148_MOESM1_ESM.pdf/9494318)
Supplement: MOESM1 [file 9494318]

Additional file 1. List of main public documents reviewed.

| <b>REGION</b>    | <b>AUTONOMIC LAW</b>                                                                                                                                                                  | <b>PROTOCOLS</b>                                                                                                             | <b>HEALTH PLANS</b>                                            |
|------------------|---------------------------------------------------------------------------------------------------------------------------------------------------------------------------------------|------------------------------------------------------------------------------------------------------------------------------|----------------------------------------------------------------|
| <b>Andalucía</b> | Ley 13/2007, de 26 de noviembre, de medidas de prevención y protección integral contra la violencia de género                                                                         | Protocolo Andaluz para la actuación ante la violencia de género (2008)                                                       | 3er Plan Andaluz de Salud 2003-2008                            |
| <b>Aragón</b>    | Ley de la Comunidad Autónoma de Aragón 4/2007, de 22 de marzo, de Prevención y Protección Integral a las Mujeres Víctimas de Violencia                                                | Protocolo para la detección y atención de la violencia de género en atención primaria (2007)                                 | Plan Estratégico de Salud 2012-2015                            |
| <b>Asturias</b>  | Ley del Principado de Asturias 2/2011, de 11 de marzo, para la igualdad de mujeres y hombres y la erradicación de la violencia de género                                              | Protocolo sanitario para mejorar la atención a las mujeres víctimas de violencia de género (2007)                            | Plan de Salud para Asturias: La salud como horizonte 2004-2007 |
| <b>Baleares</b>  | Ley 12/2006, de 20 de septiembre para la mujer                                                                                                                                        | Recomendaciones para la actuación sanitaria ante la violencia de género en la comunidad autónoma de las Illes Balears (2009) | Pla de Salut de les Illes Balears 2003/2007                    |
| <b>Canarias</b>  | Ley 16/2003 de prevención y protección integral de las mujeres contra la violencia de género. Artículo 10: Obligaciones de los centros y servicios sanitarios y de servicios sociales | Protocolo de actuación ante la violencia de género en el ámbito doméstico (2003)                                             | Plan de Salud 2004-2008: Más salud, mejores servicios          |
| <b>Cantabria</b> | Ley de Cantabria 1/2004, de 1 de abril, integral para la prevención de la violencia contra las mujeres y la protección de sus víctimas                                                | Protocolo de actuación sanitaria ante los malos tratos                                                                       | Plan de Salud de Cantabria 1996-2000                           |

|                           |                                                                                                                                                 |                                                                                                                                                                   |                                                    |
|---------------------------|-------------------------------------------------------------------------------------------------------------------------------------------------|-------------------------------------------------------------------------------------------------------------------------------------------------------------------|----------------------------------------------------|
|                           | (Artículo 20-Atención Sanitaria)                                                                                                                |                                                                                                                                                                   |                                                    |
| <b>Castilla la Mancha</b> | Ley 5/2001 de 17-05-2001 de prevención de malos tratos y de protección de las mujeres maltratadas                                               | Protocolo de actuación en atención primaria para mujeres víctimas de malos tratos (2005)                                                                          | Plan de Salud de Castilla de la Mancha 2001-2010   |
| <b>Castilla León</b>      | Ley 13/2010 de 9 de diciembre contra la violencia de género en Castilla y León                                                                  | Violencia contra las mujeres en la pareja. Guía de práctica clínica (2010)                                                                                        | III Plan de Salud Castilla y León (2008-2012)      |
| <b>Catalunya</b>          | LEY 5/2008, de 24 de abril, del derecho de las mujeres a erradicar la violencia machista.                                                       | Protocolo de actuación sanitaria ante los malos tratos (2005)<br><br>Protocolo para el abordaje de la violencia machista en el ámbito de salud en Cataluña (2009) | Plan de Salud de Cataluña 2011-2015                |
| <b>C. Valenciana</b>      | La ley Orgánica 1/2004 de 28 diciembre. Capítulo 1                                                                                              | Protocolo de actuación para la atención de las mujeres víctimas de violencia de género (2008)                                                                     | Plan de Salud de la Comunitat Valenciana 2010/2013 |
| <b>Extremadura</b>        | Ley 8/2011, de 23 de marzo, de Igualdad entre Mujeres y Hombres y contra la Violencia de Género en Extremadura                                  | Actuación Sanitaria ante la Violencia de Género-Protocolo de vigilancia epidemiológica de la violencia de género en Extremadura (2010)                            | Plan de Salud 2009-2012                            |
| <b>Galicia</b>            | Ley de la Comunidad Autónoma de Galicia 11/2007 de 27 de julio, gallega para la prevención, y el tratamiento integral de la violencia de género | Guía técnica do proceso de atención as mulheres en situación de violencia de xenero (2009)                                                                        | Plan de Salud de Galicia 2002-2005                 |

|                   |                                                                                                                                           |                                                                                                                   |                                                       |
|-------------------|-------------------------------------------------------------------------------------------------------------------------------------------|-------------------------------------------------------------------------------------------------------------------|-------------------------------------------------------|
| <b>La Rioja</b>   | Ley 3/2011, de 1 de marzo, de prevención, protección y coordinación institucional en materia de violencia en La Rioja                     | Protocolo de actuación sanitaria ante la violencia contra las mujeres (2010)                                      | II Plan de Salud, La Rioja 2009-2013                  |
| <b>Madrid</b>     | Ley 5/2005, de 20 de diciembre, Integral contra la Violencia de Género de la Comunidad de Madrid                                          | Guía de apoyo en atención primaria para abordar la violencia de pareja hacia las mujeres. (2008)                  | Plan de promoción de la salud y prevención 2011-2013. |
| <b>Murcia</b>     | Ley 7/2007, de 4 de abril, para la igualdad entre mujeres y hombres, y de protección contra la violencia de género en la Región de Murcia | Protocolo para la detección y atención de la violencia de género en atención primaria (2007)                      | Plan de Salud 2010-2015 de la Región de Murcia        |
| <b>Navarra</b>    | Ley Foral 22/2002 de 2 de julio, para la adopción de medidas integrales contra la violencia sexista. Artículo 14: Atención Sanitaria.     | Protocolos de actuación sanitaria ante los malos tratos domésticos, físicos, psicológicos y/o agresiones sexuales | Plan de Salud de Navarra 2006-2012                    |
| <b>País Vasco</b> | Ley 4/2005 de 8 febrero, para la igualdad de mujeres y hombres. Cap. VII del título III-Violencia contra las mujeres                      | Protocolo sanitario ante malos tratos domésticos                                                                  | Plan de Salud del País Vasco 2002-2010                |

### Some general sites

- Ministerio de Sanidad, Servicios Sociales e Igualdad (Informes sobre violencia de género 2005 to 2010) ` [http://www.msc.es/organizacion/sns/planCalidadSNS/e02\\_t03\\_Comision.htm](http://www.msc.es/organizacion/sns/planCalidadSNS/e02_t03_Comision.htm)
- El portal de la Asociación Español de Neuropsiquiatría Profesionales de Salud Mental (Guías sobre violencia de género de la CC.AA) [http://www.aen.es/index.php?option=com\\_docman&task=cat\\_view&gid=424](http://www.aen.es/index.php?option=com_docman&task=cat_view&gid=424)

### **Some sites of the autonomous regions**

- El portal sanitario de la Región de Murcia <http://www.murciasalud.es>
- Conselleria de Bienestar Comunitat de Valencia <http://www.bsocial.gva.es>
- Consejería de Sanidad y Servicios Sociales (Cantabria) <http://www.saludcantabria.org/>
- El portal del Gobierno de Canarias <http://www.gobcan.es/>
- El portal de planificación sanitaria y las políticas de salud (País Vasco) <http://www.osakidetza.euskadi.net>
- Portal de Salud Castilla y León <http://www.saludcastillayleon.es>
- El portal Navarra <http://www.navarra.es>
- Instituto Asturiano de la mujer <http://institutoasturianodelamujer.com>
- El portal de la comunidad de Madrid [http://www.madrid.org/cs/Satellite?pagename=PortalSalud/Page/PTSA\\_home](http://www.madrid.org/cs/Satellite?pagename=PortalSalud/Page/PTSA_home)
